# Supplementary material for: Precise quantification of microRNAs based on proximity ligation of AuNPs-immobilized DNA probes
Source: Royal Society of Chemistry journal article supplement (doi:10.1039/d3ay02136j), 2024-01-01
Supplement: d3ay02136j1.pdf [file d3ay02136j1.pdf]

Supporting Information

**Precise Quantification of MicroRNAs based on proximity ligation of AuNPs-immobilized  
DNA probes**

Keyu Li <sup>a,1</sup>, Peng Xiao <sup>a</sup>, Ningning Yuan <sup>a</sup>, Shujuan Yan <sup>b</sup>, Pei Zhao <sup>c</sup>, and Guowei Zuo <sup>\*,a</sup>

<sup>a</sup> Key Laboratory of Diagnostic Medicine Designated by the Chinese Ministry of Education, Department of Laboratory Medicine, Chongqing Medical University, Chongqing 400016, China.

<sup>b</sup> Prenatal Diagnostic Center, Guangzhou Women and Children's Medical Center, Guangzhou Medical University, Guangzhou, Guangdong 510620, China.

<sup>c</sup> Department of Laboratory Medicine, Hebei General Hospital, Shijiazhuang 050051, China.

†<sup>1</sup> equal contribution

\* co-corresponding author

Corresponding Author.Email: zuoguowei@cqmu.edu.cn (G.Z.)

**Table S1. Sequences of DNA oligonucleotides used in the work**

| Name                       | Sequence(5'-3')                                                                                                    |
|----------------------------|--------------------------------------------------------------------------------------------------------------------|
| Proximity Probe 1          | SH- <b>TTTTTTTTTT</b> GGGAACACACCTGGTAACTAT <b>CCATCATTACC</b>                                                     |
| Proximity Probe 2          | P- <b>CGGCAGTATTA</b> ACTCCACGAGACGCACTGT <b>TTTTTTTTTT</b> -SH                                                    |
| miR-200c                   | UAAUACUGCCGGGUAUGAUGGA                                                                                             |
| Forward Primer(FP)         | GGGAACACACCTGGTAAAC                                                                                                |
| Reverse Primer(RP)         | CAGTGCCTCTCGTGGAGT                                                                                                 |
| Proximity Probe-34-A       | SH-<br><b>TTTTTTTTTTTTTTTTTTTTTTTTTTTTTTTTTTT</b> GCAGCCAGGCAGTGTAGTTAG <b>CGCAAT</b><br><b>CAGC</b>               |
| Proximity Probe-34-B       | P-<br><b>TA</b> ACTACACT <b>GCCT</b> ACCTCGGACCCTGCAC <b>TTTTTTTTTTTTTTTTTTTTTTTTTTTTTTTTTTT</b><br><b>TTT</b> -SH |
| miR-34c                    | AGGCAGUGUAGUUAGCUGAUUGC                                                                                            |
| Forward Primer-34(FP-34)   | GCAGCCAGGCAGTGTAGTTAGC                                                                                             |
| Reverse Primer-34(RP-34)   | GTGCAGGGTCCGAGGT                                                                                                   |
| Proximity Probe-340-A      | SH- <b>TTTTTTTTTT</b> GTAACCCGTTGAACCC <b>ATTAATCAGTCT</b>                                                         |
| Proximity Probe-340-B      | P- <b>CATTGCTTTATAA</b> ACCTCGGACCCTGCAC <b>TTTTTTTTTT</b> -SH                                                     |
| miR-340                    | UUAUAAAGCAAUGAGACUGAUU                                                                                             |
| Forward Primer-340(FP-340) | GTAACCCGTTGAACCC <b>CATT</b>                                                                                       |
| Reverse Primer-340(RP-340) | GTGCAGGGTCCGAGGT                                                                                                   |
| Stem-loop Primer           | GTCGTATCCAGTGCAGGGTCCGAGGTATT <b>CGCACTGGATACGACTCCATC</b>                                                         |

Proximity Probe 1 is designed by adding spacer region(orange),forward primer region(blue),a connector region(green) in the 3'-end.Proximity Probe 2 is designed by adding spacer

region(orange),reverse primer region(blue),a connector region(green) in the 5'-end.

**Table S2. Sequences of miRNA for specificity using in this work**

| Name     | Sequence(5'-3')                                   |
|----------|---------------------------------------------------|
| miR-200a | UAA <b>C</b> ACUG <b>UC</b> UGGUAACGAUGU          |
| miR-200b | UAAUACUGCC <b>U</b> GGUAAUGAUG <b>A</b>           |
| miR-200c | UAAUACUGCCGGGUA <u>AAUGAUGGA</u>                  |
| miR-141  | UAA <b>C</b> ACUG <b>UC</b> UGGUA <b>AA</b> GAUGG |
| miR-429  | UAAUACUG <b>UC</b> UGGUA <b>AA</b> ACCGU          |
| miR-21   | UAGCUUAUCAGACUGAUGUUGA                            |

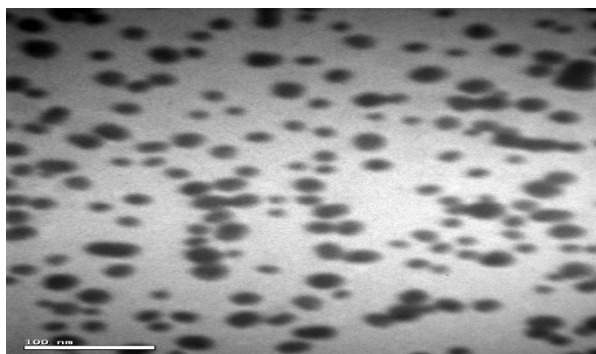

Fig. S1 Transmission electron microscopy results of AuNPs.

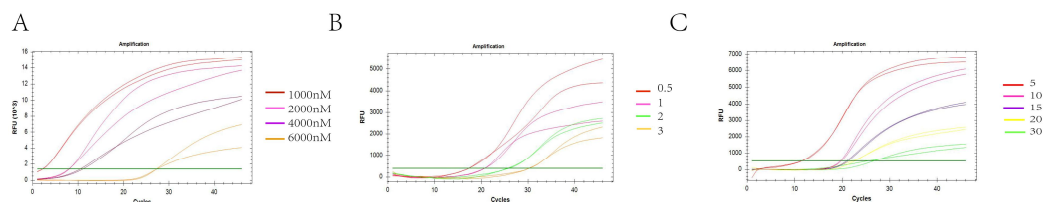

Fig.S2 qPCR curves of the optimization of experimental conditions: (A) qPCR curves of different probes. (B) qPCR curves of different ligation time. (C) qPCR curves of different primer concentrations.
